# Supplementary material
Source: MDPI journal article supplement (https://www.mdpi.com/2079-9276/9/9/106)
Supplement: s1 [file s1]

## Sheet: CoverSheet
Article published in MDPI journal Resources - https://www.mdpi.com/journal/resources/
SUPPLEMENTARY MATERIAL FOR:
Supply risk considerations for the elements in nickel-based superalloys
Christoph Helbig 1,*, Alex M. Bradshaw 2,3, Andrea Thorenz 1 and Axel Tuma 1
1: Resource Lab, University of Augsburg, Universitaetsstr. 16, 86159 Augsburg, Germany
2: Max Planck Institute for Plasma Physics, Boltzmannstraße 2, 85748 Garching, Germany
3: Fritz Haber Institute of the Max Planck Society, Faradayweg 4-6, 14195 Berlin, Germany
*: Correspondence: christoph.helbig@wiwi.uni-augsburg.de
Tables
Table S1: Alloys information
Table S2: Elements information
Table S3: Elements prices
Table S4: Chemical composition of alloys
Table S5: Cost contribution
Table S6: Supply risk alloys

## Sheet: S1 Alloys Info
Name	Generation	Group	Al	Ti	Cr	Fe	Co	Ni	Nb	Mo	Ru	Ta	W	Re	Hf	Si	Density	T(°C)/1000h creep/137MPa (estimates)	Number Elements	Prices (USD/kg)	Source
Inconel 718	Wrought	Inconel	0.52	0.93	19.06	18.15	0.11	53	5.08	3.04	0	0	0	0	0	0	8.2	850	14	82.8901	Pollock & Tin 2006
Rene 41	Wrought	Rene	1.5	3.1	19	0	11	55.4	0	10	0	0	0	0	0	0	8.24	850	11	107.507	Pollock & Tin 2006
Nimonic 80A	Wrought	Nimonic	1.4	2.4	19.5	0	0	76.7	0	0	0	0	0	0	0	0	8.19	825	11	89.997	Pollock & Tin 2006
Waspaloy	Wrought	other	1.3	3	19.5	0	13.5	58.4	0	4.3	0	0	0	0	0	0	8.16	860	12	108.707	Pollock & Tin 2006
Udimet 720	Wrought	Udimet	2.5	5	17.9	0	14.7	55.6	0	3	0	0	1.3	0	0	0	8.08	850	13	110.296	Pollock & Tin 2006
Avg. Wrought	Wrought	Average	1.444	2.886	18.992	3.63	7.862	59.82	1.016	4.068	0	0	0.26	0	0	0	8.174	847	14	99.9135	average
Rene 95	Powder	Rene	3.5	2.5	13	0	8	62.8	3.5	3.5	0	0	3.2	0	0	0	8.22	900	14	114.351	Pollock & Tin 2006
Rene 88 DT	Powder	Rene	2.1	3.7	16	0	13	56.5	0.7	4	0	0	4	0	0	0	8.33	900	14	119.948	Pollock & Tin 2006
N18	Powder	other	4.4	4.4	11.2	0	15.6	57.4	0	6.5	0	0	0	0	0.5	0	8	900	11	108.368	Pollock & Tin 2006
Inconel 100	Powder	Inconel	4.9	4.3	12.4	0	18.4	56.8	0	3.2	0	0	0	0	0	0	7.75	900	11	107.72	Pollock & Tin 2006
Avg. PP	Powder	Average	3.725	3.725	13.15	0	13.75	58.375	1.05	4.3	0	0	1.8	0	0.125	0	8.075	900	14	112.558	average
Mar-M246	Cast	other	5.5	1	8.3	0	10	60	0	0.7	0	3	10	0	1.5	0	8.44	960	13	163.918	Pollock & Tin 2006
Inconel 713LC	Cast	Inconel	5.9	0.6	12	0	0	75	2	4.5	0	0	0	0	0	0	7.913	925	11	89.9719	Pollock & Tin 2006
C1023	Cast	other	4.2	3.6	15.5	0	10	58.2	0	8.5	0	0	0	0	0	0	8	950	11	101.217	Pollock & Tin 2006
Rene 80	Cast	Rene	3	5	14	0	9.5	55.7	0	4	0	4.8	4	0	0	0	8.2	950	13	168.223	Pollock & Tin 2006
Avg. CC	Cast	Average	4.65	2.55	12.45	0	7.375	62.225	0.5	4.425	0	1.95	3.5	0	0.375	0	8.13825	946.25	15	130.128	average
Inconel 792	DS	Inconel	3.4	4	12.6	0	9	59.5	0	1.9	0	4.3	4.3	0	1	0	8.25	975	13	162.271	Pollock & Tin 2006
GTD111	DS	other	3	4.9	14	0	9.5	60.5	0	1.5	0	2.8	3.8	0	0	0	8.17	975	13	143.106	Pollock & Tin 2006
Avg. DS	DS	Average	3.2	4.45	13.3	0	9.25	60	0	1.7	0	3.55	4.05	0	0.5	0	8.21	975	13	152.645	average
CMSX-2	Ni 1G	CMSX	5.6	1	8	0	4.6	63.2	0	0.6	0	9	8	0	0	0	8.56	1015	13	229.764	Long et al. 2018
NASAIR100	Ni 1G	NASAIR	5.5	1.2	8.5	0	0	70.3	0	1.1	0	3.3	10.1	0	0	0	8.54	1025	13	157.073	Long et al. 2018
PWA1480	Ni 1G	PWA	5	1.5	10	0	5	62.5	0	0	0	12	4	0	0	0	8.7	1005	13	262.367	Long et al. 2018
Rene N4	Ni 1G	Rene	4.2	1.5	8.8	0	7.5	63.15	0.5	1.5	0.2	6.5	6	0	0.15	0	8.56	1015	15	228.672	Pollock & Tin 2006
SRR99	Ni 1G	Rolls-Royce	5.5	2.2	8	0	5	57.3	0	0	0	12	10	0	0	0	8.56	1015	12	271.263	Long et al. 2018
TMS-6	Ni 1G	TMS	5.3	0	9.2	0	0	66.4	0	0	0	10.4	8.7	0	0	0	8.6	1015	10	243.446	Reed 2006
AM1	Ni 1G	other	5.2	1.1	7.8	0	6.5	63.8	0	2	0	7.9	5.7	0	0	0	8.59	1015	13	215.197	Reed 2006
Avg. 1G SX	Ni 1G	Average	5.18571	1.21429	8.61429	0	4.08571	63.8071	0.0714286	0.742857	0.0285714	8.72857	7.5	0	0.0214286	0	8.58714	1015	15	229.589	average
CMSX-4	Ni 2G	CMSX	5.6	1	6.5	0	9	61.7	0	0.6	0	6.5	6	3	0.1	0	8.7	1040	14	861.307	Sato et al. 2008
PWA1484	Ni 2G	PWA	5.6	0	5	0	10	59.3	0	2	0	9	6	3	0.1	0	8.96	1050	13	922.081	Sato et al. 2008
Rene N5	Ni 2G	Rene	6.2	0	7	0	8	61.6	0	2	0	7	5	3	0.2	0	8.63	1060	13	856.923	Sato et al. 2008
MC2	Ni 2G	other	5	1.5	8	0	5	64.5	0	2	0	6	8	0	0	0	8.63	1050	13	195.474	Darolia 2019
Avg. 2G SX	Ni 2G	Average	5.6	0.625	6.625	0	8	61.775	0	1.65	0	7.125	6.25	2.25	0.1	0	8.73	1050	14	706.82	average
CMSX-10	Ni 3G	CMSX	5.7	0.5	2	0	3	69.37	0	0.4	0	8	5	6	0.03	0	9.05	1050	15	1589.11	Sato et al. 2008
Rene N6	Ni 3G	Rene	5.75	0	4.2	0	12.5	57.4	0	1.4	0	7.2	6	5.4	0.15	0	8.98	1050	14	1446.97	Sato et al. 2008
TMS-75	Ni 3G	TMS	6	0	3	0	12	59.9	0	2	0	6	6	5	0.1	0	8.89	1060	14	1327.12	Sato et al. 2008
Avg. 3G SX	Ni 3G	Average	5.81667	0.166667	3.06667	0	9.16667	62.2233	0	1.26667	0	7.06667	5.66667	5.46667	0.0933333	0	8.97333	1053.33	14	1453.7	average
CMSX-10var	Ni 4G	CMSX	5.7	0.2	2	0	3	69.07	0.1	0.4	0	8	5	6.5	0.03	0	9.1	1095	16	1712.74	Darolia 2019
EPM-102	Ni 4G	EPM	5.5	0	2	0	16.5	50.65	0	2	3	8.3	6	5.9	0.15	0	9.2	1095	14	2078.4	Long et al. 2018
PWA1497	Ni 4G	PWA	5.5	0	2	0	16.5	50.75	0	2	3	8.2	6	5.9	0.15	0	9.2	1095	14	2077.08	Long et al. 2018
TMS-138	Ni 4G	TMS	5.8	0	3.2	0	5.8	63.1	0	2.9	2	5.6	5.9	5.6	0.1	0	8.95	1095	14	1754.31	Sato et al. 2008
TMS-138A	Ni 4G	TMS	5.7	0	3.2	0	5.8	61.7	0	2.9	3.6	5.6	5.6	5.8	0.1	0	9.01	1095	14	2050.28	Sato et al. 2008
MC-NG	Ni 4G	other	6	0.5	4	0	0	70.4	0	1	4	5	5	4	0.1	0	8.75	1090	15	1634.27	Sato et al. 2008
MX4	Ni 4G	other	5.6	0	2	0	16.5	50.45	0	2	3	8.3	6	6	0.15	0	9.2	1095	14	2101.47	Sato et al. 2008
Avg. 4G SX	Ni 4G	Average	5.68571	0.1	2.62857	0	9.15714	59.4457	0.0142857	1.88571	2.65714	7	5.64286	5.67143	0.111429	0	9.05857	1094.29	16	1913.51	average
TMS-162	Ni 5G	TMS	5.8	0	3	0	5.8	59.1	0	3.9	6	5.6	5.8	4.9	0.1	0	9.04	1110	14	2213.36	Sato et al. 2008
TMS-173	Ni 5G	TMS	5.6	0	3	0	5.6	59.8	0	2.8	5	5.6	5.6	6.9	0.1	0	9.11	1110	14	2536.98	Sato et al. 2008
TMS-196	Ni 5G	TMS	5.6	0	4.6	0	5.6	59.7	0	2.4	5	5.6	5	6.4	0.1	0	9.01	1110	14	2393.77	Sato et al. 2008
Avg. 5G SX	Ni 5G	Average	5.66667	0	3.53333	0	5.66667	59.5333	0	3.03333	5.33333	5.6	5.46667	6.06667	0.1	0	9.05333	1110	14	2381.03	average
TMS-238 (6G SX)	Ni 6G	TMS 6G	5.9	0	4.6	0	6.5	58.8	0	1.1	5	7.6	4	6.4	0.1	0	9.12	1120	14	2447.73	Darolia 2019
CMSX-8	Ni -Re	CMSX	5.7	0.7	5.4	0	10	59.4	0.5	0.6	0	8	8	1.5	0.2	0	8.4	1080	14	539.421	Darolia 2019
Rene N515	Ni -Re	Rene	6.2	0	6	0	7.5	64.2	0	2	0	6.5	6	1.2	0.4	0	8.68178	1080	13	464.014	Darolia 2019
LEK94	Ni -Re	LEK	6.6	1	6.1	0	7.5	68.5	0	2	0	2.3	3.4	2.5	0.1	0	8.2	1080	14	650.888	Darolia 2019
DD6	Ni -Re	other	5.6	0	4.3	0	9	61	0.5	2	0	7.5	8	2	0.1	0	8.83	1080	14	671.481	Darolia 2019
Avg. low-Re SX	Ni -Re	Average	6.025	0.425	5.45	0	8.5	63.275	0.25	1.65	0	6.075	6.35	1.8	0.2	0	8.52795	1080	15	582.215	average

## Sheet: S2 Elements Info
	Al	Ti	Cr	Fe	Co	Ni	Nb	Mo	Ru	Ta	W	Re	Calculation	Data sources (refs. in the main article)
SR	46.389	43.9536	53.3213	52.3062	60.1942	56.0674	53.1308	61.4554	54.0856	50.3691	56.024	62.7628	weighted average (Table 1 in main article)	[36,38-42,45-48]
Prod 2015 (t)	299044000	7744028	31216481	1426887000	120732	2177884	63349.3	287434	65.111	1196.08	89742	49.72	see USGS (2018) [38]	[38]
R1 (t)	28000000000	829000000	500000000	85000000000	7000000	78000000	4300000	15000000	67000	100000	3100000	2500	see USGS (2018) [38]	[38]
τR1	93.6317	107.05	16.0172	59.5702	57.9797	35.8146	67.8777	52.1859	1029.01	83.6065	34.5435	50.2816	τR1=R1/Prod	calculation
S1	11.1385	0	94.7442	59.697	61.5109	82.5756	49.5654	67.7759	0	27.3583	83.5453	69.7178	S1=100-0.2τ_R1-0.008τ_R1^2	calculation
R2 (t)	55000000000	2000000000	12000000000	230000000000	145000000	130000000	more than adequate	19400000	100000	adequate	27500000	11000	see USGS (2018) [38]	[38]
τR2	183.919	258.264	384.412	161.19	1201.01	59.691	>200	67.4938	>200	>200	306.434	221.239	τR2=R2/Prod	calculation
S2	13.9553	0	0	31.9165	0	86.9049	0	84.1398	0	0	0	0	S2=100-0.1τ_R2-0.002τ_R2^2	calculation
OSR (%)	45	11	66	54	50	78	44	33	20	1-10	80	50	see Graedel et al. (2011) [39]	[39]
RCR (%)	35	52	19	40	32	35	22	33	55	10-25	46	10-25	see Graedel et al. (2011) [39]	[39]
EoL-RIR (%)	15.75	5.72	12.54	21.6	16	27.3	9.68	10.89	11	1	36.8	9	EoL-RIR=OSR*RCR	calculation
S3	84.25	94.28	87.46	78.4	84	72.7	90.32	89.11	89	99	63.2	91	S3=100-EoLRIR	calculation
DFT('13)/P('13)	k.A.	0	low	k.A.	0	k.A.	0,01 (2006)	k.A.	0 (2006)	0.4	k.A.	1	see Marscheider-Weidemann et al. (2016) [40]	[40]
DFT('35)/P('13)	k.A.	0.2	low	k.A.	0.9	k.A.	0,03 (2006)	k.A.	0,03 (2006)	1.6	k.A.	2.5	see Marscheider-Weidemann et al. (2016) [40]	[40]
δ'35, '13	0	0.2	0	0	0.9	0	0.02	0	0.03	1.2	0	1.5	(DFT('35)-DFT('13))/P('13)	[40]
D1	0	8.32178	0	0	29.6049	0	0.82545	0	1.23238	36.4889	0	42.5291	D1=1000⋅δ_(t,t^' )	calculation
Companionality	0	0	0.02	0.01	0.85	0.02	0.02	0.46	1	0.28	0.05	1	see Nassar et al. (2015)	[42]
D2	0	0	2	1	85	2	2	46	100	28	5	100	D2=100⋅Companionality	calculation
SCI	1 (Bauxite), 28 (Aluminium)	42	20	24	42	29	20	28	43	44	35	48	see Helbig et al. (2017) [36]	[36]
D3	28	42	20	24	42	29	20	28	43	44	35	48	D3=SCI	calculation
Substitutability	44	63	76	57	54	62	42	70	63	41	53	90	expert assessment [41]	[41]
D4	44	63	76	57	54	62	42	70	63	41	53	90	D4=Substitutability	calculation
HHIL (M)	1630.14	1221.15	3033.26	1960.84	3140.61	1040.65	8266.25	2889.03	6957.53	2345.83	6678.53	3374.13	Herfindahl-Hirschman-Index	[38]
HHIL (R)	2876.68		2386.42	3320.89	2650.61	1450.48	8138.77						Herfindahl-Hirschman-Index	[38]
HHIL (S)	3056.7			2629.84									Herfindahl-Hirschman-Index	[38]
C1	74.353	54.4973	74.1864	76.1469	74.939	58.2216	95.8814	73.1321	92.1516	68.625	91.266	76.491	C1=21.64 ln⁡〖HHI_country 〗-99.31	calculation
HHIU (M)	771	1317	551	837	449	624	6441	2183	1373	2002	6920	2533	Herfindahl-Hirschman-Index	[45]
HHIU (R)	2198		1854	k.A.	1902	1191							Herfindahl-Hirschman-Index	[45]
HHIU (S)	2221			2269									Herfindahl-Hirschman-Index	[45]
C2	76.2073	67.945	73.3518	76.5454	73.756	66.3551	93.0406	75.9345	68.6034	74.5661	94.1747	78.2855	C2=15.81 ln⁡〖HHI_company 〗-45.62	calculation
WGI-PV (M)	-0.0348531	-0.213161	-0.361299	0.00443257	-1.19765	-0.214608	-0.202085	-0.145043	-0.294885	-1.03909	-0.444161	0.4557	production-weighted average of producing countries	[38,46]
WGI-PV (R)	-0.183862		-0.326461	-0.334264	-0.0400728	-0.0536739	-0.17996						production-weighted average of producing countries	[38,46]
WGI-PV (S)	-0.235274			-0.268873									production-weighted average of producing countries	[38,46]
P1	54.7055	54.2632	57.226	56.6853	73.9531	54.2922	54.0417	52.9009	55.8977	70.7819	58.8832	40.886	P1=20⋅(2.5-WGI) (maximum of Mining, Refining, Smelting)	calculation
PPI	61.0582	51.3364	57.9272	67.5077	50.0734	56.3242	58.8973	62.1428	51.3534	49.0716	47.2263	72.9737	production-weighted average of producing countries	[38,47]
P2	38.9418	48.6636	42.0728	32.4923	49.9266	43.6758	41.1027	37.8572	48.6466	50.9284	52.7737	27.0263	P2=100-PPI (maximum of Mining, Refining, Smelting)	calculation
HDI (M)	0.77612	0.719638	0.725386	0.81733	0.577942	0.763112	0.768255	0.794265	0.703787	0.527859	0.745871	0.841314	production-weighted average of producing countries	[38,48]
HDI (R)	0.792804		0.731368	0.76889	0.781502	0.805988	0.773108						production-weighted average of producing countries	[38,48]
HDI (S)	0.782368			0.777416									production-weighted average of producing countries	[38,48]
P3	73.8365	61.5809	63.5457	77.9447	71.9434	76.0448	70.5373	74.0813	58.9257	29.4571	65.975	81.9621	P3=100⋅(HDI-0.352)/(0.949-0.352) (maximum of Mining, Refining, Smelting)	calculation

## Sheet: S3 Elements prices
	price	unit	price	unit	data source
Al	1.66226	USD/kg	1662.26	USD/t	T. Gaugler, pers. communication
Ti	6.77358	USD/kg	48403.5	CNY/t	T. Gaugler, pers. communication
Cr	8.6815	USD/kg	8681.5	USD/t	T. Gaugler, pers. communication
Fe	0.0940484	USD/kg	94.0484	USD/t	Dera Preismonitor
Co	28.4771	USD/kg	28477.1	USD/t	T. Gaugler, pers. communication
Ni	11.8773	USD/kg	11877.3	USD/t	T. Gaugler, pers. communication
Nb	31.4573	USD/kg	9.97459	USD/pound Nb2O5	T. Gaugler, pers. communication
Mo	14.5	USD/kg	14500	USD/t	USGS Data Series 140
Ru	1672.94	USD/kg	47.4269	USD/troy	T. Gaugler, pers. communication
Ta	156.209	USD/kg	70.8553	USD/pound	T. Gaugler, pers. communication
W	37.8	USD/kg	37800	USD/t	USGS Data Series 140
Re	2529.19	USD/kg	1147.22	USD/pound	T. Gaugler, pers. communication

## Sheet: S4 Chemical composition
Mass (kg/dm³)	Al	Ti	Cr	Fe	Co	Ni	Nb	Mo	Ru	Ta	W	Re
Inconel 718	0.04264	0.07626	1.56292	1.4883	0.00902	4.346	0.41656	0.24928	0	0	0	0
Rene 41	0.1236	0.25544	1.5656	0	0.9064	4.56496	0	0.824	0	0	0	0
Nimonic 80A	0.11466	0.19656	1.59705	0	0	6.28173	0	0	0	0	0	0
Waspaloy	0.10608	0.2448	1.5912	0	1.1016	4.76544	0	0.35088	0	0	0	0
Udimet 720	0.202	0.404	1.44632	0	1.18776	4.49248	0	0.2424	0	0	0.10504	0
Avg. Wrought	0.118033	0.235902	1.55241	0.296716	0.64264	4.88969	0.0830478	0.332518	0	0	0.0212524	0
Rene 95	0.2877	0.2055	1.0686	0	0.6576	5.16216	0.2877	0.2877	0	0	0.26304	0
Rene 88 DT	0.17493	0.30821	1.3328	0	1.0829	4.70645	0.05831	0.3332	0	0	0.3332	0
N18	0.352	0.352	0.896	0	1.248	4.592	0	0.52	0	0	0	0
Inconel 100	0.37975	0.33325	0.961	0	1.426	4.402	0	0.248	0	0	0	0
Avg. PP	0.300794	0.300794	1.06186	0	1.11031	4.71378	0.0847875	0.347225	0	0	0.14535	0
Mar-M246	0.4642	0.0844	0.70052	0	0.844	5.064	0	0.05908	0	0.2532	0.844	0
Inconel 713LC	0.466867	0.047478	0.94956	0	0	5.93475	0.15826	0.356085	0	0	0	0
C1023	0.336	0.288	1.24	0	0.8	4.656	0	0.68	0	0	0	0
Rene 80	0.246	0.41	1.148	0	0.779	4.5674	0	0.328	0	0.3936	0.328	0
Avg. CC	0.378429	0.207525	1.01321	0	0.600196	5.06403	0.0406912	0.360118	0	0.158696	0.284839	0
Inconel 792	0.2805	0.33	1.0395	0	0.7425	4.90875	0	0.15675	0	0.35475	0.35475	0
GTD111	0.2451	0.40033	1.1438	0	0.77615	4.94285	0	0.12255	0	0.22876	0.31046	0
Avg. DS	0.26272	0.365345	1.09193	0	0.759425	4.926	0	0.13957	0	0.291455	0.332505	0
CMSX-2	0.47936	0.0856	0.6848	0	0.39376	5.40992	0	0.05136	0	0.7704	0.6848	0
NASAIR100	0.4697	0.10248	0.7259	0	0	6.00362	0	0.09394	0	0.28182	0.86254	0
PWA1480	0.435	0.1305	0.87	0	0.435	5.4375	0	0	0	1.044	0.348	0
Rene N4	0.35952	0.1284	0.75328	0	0.642	5.40564	0.0428	0.1284	0.01712	0.5564	0.5136	0
SRR99	0.4708	0.18832	0.6848	0	0.428	4.90488	0	0	0	1.0272	0.856	0
TMS-6	0.4558	0	0.7912	0	0	5.7104	0	0	0	0.8944	0.7482	0
AM1	0.44668	0.09449	0.67002	0	0.55835	5.48042	0	0.1718	0	0.67861	0.48963	0
Avg. 1G SX	0.445305	0.104272	0.739721	0	0.350846	5.47921	0.00613367	0.0637902	0.00245347	0.749535	0.644036	0
CMSX-4	0.4872	0.087	0.5655	0	0.783	5.3679	0	0.0522	0	0.5655	0.522	0.261
PWA1484	0.50176	0	0.448	0	0.896	5.31328	0	0.1792	0	0.8064	0.5376	0.2688
Rene N5	0.53506	0	0.6041	0	0.6904	5.31608	0	0.1726	0	0.6041	0.4315	0.2589
MC2	0.4315	0.12945	0.6904	0	0.4315	5.56635	0	0.1726	0	0.5178	0.6904	0
Avg. 2G SX	0.48888	0.0545625	0.578363	0	0.6984	5.39296	0	0.144045	0	0.622012	0.545625	0.196425
CMSX-10	0.51585	0.04525	0.181	0	0.2715	6.27799	0	0.0362	0	0.724	0.4525	0.543
Rene N6	0.51635	0	0.37716	0	1.1225	5.15452	0	0.12572	0	0.64656	0.5388	0.48492
TMS-75	0.5334	0	0.2667	0	1.0668	5.32511	0	0.1778	0	0.5334	0.5334	0.4445
Avg. 3G SX	0.521949	0.0149556	0.275182	0	0.822556	5.58351	0	0.113662	0	0.634116	0.508489	0.490542
CMSX-10var	0.5187	0.0182	0.182	0	0.273	6.28537	0.0091	0.0364	0	0.728	0.455	0.5915
EPM-102	0.506	0	0.184	0	1.518	4.6598	0	0.184	0.276	0.7636	0.552	0.5428
PWA1497	0.506	0	0.184	0	1.518	4.669	0	0.184	0.276	0.7544	0.552	0.5428
TMS-138	0.5191	0	0.2864	0	0.5191	5.64745	0	0.25955	0.179	0.5012	0.52805	0.5012
TMS-138A	0.51357	0	0.28832	0	0.52258	5.55917	0	0.26129	0.32436	0.50456	0.50456	0.52258
MC-NG	0.525	0.04375	0.35	0	0	6.16	0	0.0875	0.35	0.4375	0.4375	0.35
MX4	0.5152	0	0.184	0	1.518	4.6414	0	0.184	0.276	0.7636	0.552	0.552
Avg. 4G SX	0.515044	0.00905857	0.238111	0	0.829506	5.38493	0.00129408	0.170819	0.240699	0.6341	0.511162	0.51375
TMS-162	0.52432	0	0.2712	0	0.52432	5.34264	0	0.35256	0.5424	0.50624	0.52432	0.44296
TMS-173	0.51016	0	0.2733	0	0.51016	5.44778	0	0.25508	0.4555	0.51016	0.51016	0.62859
TMS-196	0.50456	0	0.41446	0	0.50456	5.37897	0	0.21624	0.4505	0.50456	0.4505	0.57664
Avg. 5G SX	0.513022	0	0.319884	0	0.513022	5.38975	0	0.274618	0.482844	0.506987	0.494916	0.549236
TMS-238 (6G SX)	0.53808	0	0.41952	0	0.5928	5.36256	0	0.10032	0.456	0.69312	0.3648	0.58368
CMSX-8	0.4788	0.0588	0.4536	0	0.84	4.9896	0.042	0.0504	0	0.672	0.672	0.126
Rene N515	0.53827	0	0.520907	0	0.651134	5.5737	0	0.173636	0	0.564316	0.520907	0.104181
LEK94	0.5412	0.082	0.5002	0	0.615	5.617	0	0.164	0	0.1886	0.2788	0.205
DD6	0.49448	0	0.37969	0	0.7947	5.3863	0.04415	0.1766	0	0.66225	0.7064	0.1766
Avg. low-Re SX	0.513809	0.0362438	0.464773	0	0.724875	5.39606	0.0213199	0.140711	0	0.518073	0.541525	0.153503

## Sheet: S5 Cost contribution
Costs (USD/dm³)	Al	Ti	Cr	Fe	Co	Ni	Nb	Mo	Ru	Ta	W	Re
Inconel 718	0.070879	0.516553	13.5685	0.139972	0.256863	51.6189	13.1039	3.61456	0	0	0	0
Rene 41	0.205456	1.73024	13.5918	0	25.8116	54.2195	0	11.948	0	0	0	0
Nimonic 80A	0.190595	1.33141	13.8648	0	0	74.6102	0	0	0	0	0	0
Waspaloy	0.176333	1.65817	13.814	0	31.3703	56.6007	0	5.08776	0	0	0	0
Udimet 720	0.335777	2.73653	12.5562	0	33.8239	53.3587	0	3.5148	0	0	3.97051	0
Avg. Wrought	0.196201	1.5979	13.4772	0.0279057	18.3005	58.0764	2.61246	4.82152	0	0	0.803341	0
Rene 95	0.478234	1.39197	9.27706	0	18.7265	61.3127	9.05027	4.17165	0	0	9.94291	0
Rene 88 DT	0.29078	2.08768	11.5707	0	30.8378	55.9001	1.83428	4.8314	0	0	12.595	0
N18	0.585117	2.3843	7.77863	0	35.5394	54.5407	0	7.54	0	0	0	0
Inconel 100	0.631245	2.2573	8.34293	0	40.6083	52.284	0	3.596	0	0	0	0
Avg. PP	0.499999	2.03745	9.21856	0	31.6184	55.9871	2.66719	5.03476	0	0	5.49423	0
Mar-M246	0.771623	0.57169	6.08157	0	24.0346	60.1468	0	0.85666	0	39.5522	31.9032	0
Inconel 713LC	0.776057	0.321596	8.24361	0	0	70.489	4.97843	5.16323	0	0	0	0
C1023	0.558521	1.95079	10.7651	0	22.7816	55.3009	0	9.86	0	0	0	0
Rene 80	0.408917	2.77717	9.96637	0	22.1836	54.2485	0	4.756	0	61.484	12.3984	0
Avg. CC	0.629049	1.40569	8.79621	0	17.0918	60.1471	1.28004	5.2217	0	24.7898	10.7669	0
Inconel 792	0.466265	2.23528	9.02442	0	21.1442	58.3029	0	2.27287	0	55.4152	13.4095	0
GTD111	0.407421	2.71167	9.9299	0	22.1025	58.7079	0	1.77697	0	35.7344	11.7354	0
Avg. DS	0.43671	2.47469	9.47959	0	21.6262	58.5077	0	2.02377	0	45.528	12.5687	0
CMSX-2	0.796823	0.579818	5.94509	0	11.2131	64.2554	0	0.74472	0	120.344	25.8854	0
NASAIR100	0.780766	0.694156	6.3019	0	0	71.307	0	1.36213	0	44.0229	32.604	0
PWA1480	0.723085	0.883952	7.55291	0	12.3875	64.583	0	0	0	163.082	13.1544	0
Rene N4	0.597617	0.869728	6.5396	0	18.2823	64.2046	1.34637	1.8618	28.6407	86.9148	19.4141	0
SRR99	0.782594	1.2756	5.94509	0	12.1882	58.2569	0	0	0	160.458	32.3568	0
TMS-6	0.75766	0	6.86881	0	0	67.8243	0	0	0	139.714	28.282	0
AM1	0.7425	0.640036	5.81678	0	15.9002	65.0928	0	2.4911	0	106.005	18.508	0
Avg. 1G SX	0.740214	0.706298	6.42189	0	9.99106	65.0784	0.192949	0.924958	4.1045	117.084	24.3445	0
CMSX-4	0.809855	0.589301	4.90939	0	22.2975	63.7563	0	0.7569	0	88.3364	19.7316	660.12
PWA1484	0.834058	0	3.88931	0	25.5154	63.1076	0	2.5984	0	125.967	20.3213	679.847
Rene N5	0.889411	0	5.2445	0	19.6606	63.1408	0	2.5027	0	94.366	16.3107	654.808
MC2	0.717267	0.87684	5.99371	0	12.2878	66.1134	0	2.5027	0	80.8852	26.0971	0
Avg. 2G SX	0.812648	0.369583	5.02106	0	19.8884	64.0539	0	2.08865	0	97.1641	20.6246	496.797
CMSX-10	0.857479	0.306504	1.57135	0	7.73152	74.5657	0	0.5249	0	113.096	17.1045	1373.35
Rene N6	0.85831	0	3.27432	0	31.9655	61.2219	0	1.82294	0	100.999	20.3666	1226.46
TMS-75	0.886652	0	2.31536	0	30.3793	63.2481	0	2.5781	0	83.322	20.1625	1124.23
Avg. 3G SX	0.867617	0.101303	2.389	0	23.424	66.3172	0	1.6481	0	99.0547	19.2209	1240.68
CMSX-10var	0.862217	0.123279	1.58003	0	7.77424	74.6534	0.286262	0.5278	0	113.72	17.199	1496.02
EPM-102	0.841106	0	1.5974	0	43.2282	55.346	0	2.668	461.73	119.281	20.8656	1372.85
PWA1497	0.841106	0	1.5974	0	43.2282	55.4553	0	2.668	461.73	117.844	20.8656	1372.85
TMS-138	0.862882	0	2.48638	0	14.7824	67.0766	0	3.76347	299.455	78.2921	19.9603	1267.63
TMS-138A	0.853689	0	2.50305	0	14.8815	66.0281	0	3.7887	542.633	78.817	19.0724	1321.71
MC-NG	0.872689	0.296344	3.03853	0	0	73.1644	0	1.26875	585.527	68.3416	16.5375	885.218
MX4	0.856399	0	1.5974	0	43.2282	55.1274	0	2.668	461.73	119.281	20.8656	1396.12
Avg. 4G SX	0.85614	0.061359	2.06716	0	23.6219	63.9586	0.0407083	2.47687	402.674	99.0523	19.3219	1299.37
TMS-162	0.871559	0	2.35442	0	14.9311	63.4563	0	5.11212	907.4	79.0794	19.8193	1120.33
TMS-173	0.848021	0	2.37266	0	14.5279	64.7051	0	3.69866	762.022	79.6917	19.284	1589.83
TMS-196	0.838712	0	3.59814	0	14.3684	63.8878	0	3.13548	753.658	78.817	17.0289	1458.43
Avg. 5G SX	0.852779	0	2.77708	0	14.6094	64.0159	0	3.98196	807.768	79.196	18.7078	1389.12
TMS-238 (6G SX)	0.894431	0	3.64206	0	16.8812	63.6929	0	1.45464	762.859	108.272	13.7894	1476.24
CMSX-8	0.795892	0.398286	3.93793	0	23.9207	59.2631	1.32121	0.7308	0	104.973	25.4016	318.678
Rene N515	0.894748	0	4.52225	0	18.5424	66.2007	0	2.51772	0	88.1514	19.6903	263.495
LEK94	0.899618	0.555434	4.34249	0	17.5134	66.715	0	2.378	0	29.4611	10.5386	518.485
DD6	0.821957	0	3.29628	0	22.6307	63.9749	1.38884	2.5607	0	103.45	26.7019	446.656
Avg. low-Re SX	0.854086	0.2455	4.03493	0	20.6423	64.0908	0.670666	2.04031	0	80.9278	20.4696	388.239

## Sheet: S6 SR Alloys
SR scores	Average Equal categories	Mass Equal categories	Cost Equal categories	Max Equal categories
Inconel 718	54.0511	54.6558	55.3112	61.4554
Rene 41	54.452	56.0177	57.0964	61.4554
Nimonic 80A	53.587	55.1057	55.4446	56.0674
Waspaloy	54.9305	55.8315	56.961	61.4554
Udimet 720	55.0146	55.4959	56.8604	61.4554
Avg. Wrought	54.3166	55.4213	56.4219	61.4554
Rene 95	54.5853	55.4833	56.2928	61.4554
Rene 88 DT	54.88	55.7063	56.7967	61.4554
N18	55.0768	55.5146	57.2797	61.4554
Inconel 100	55.0768	55.6635	57.2797	61.4554
Avg. PP	54.88	55.5919	56.9088	61.4554
Mar-M246	54.4701	54.6201	55.1275	61.4554
Inconel 713LC	54.0595	55.2779	55.8357	61.4554
C1023	54.452	55.6698	56.9422	61.4554
Rene 80	54.2588	55.1192	54.2918	61.4554
Avg. CC	54.3042	55.1717	55.3443	61.4554
Inconel 792	54.2588	54.574	54.3836	61.4554
GTD111	54.2588	55.1107	54.8976	61.4554
Avg. DS	54.2588	54.8423	54.6257	61.4554
CMSX-2	54.4701	54.8904	53.1616	61.4554
NASAIR100	54.1526	55.0231	54.2962	61.4554
PWA1480	53.6173	54.6479	52.5716	60.1942
Rene N4	54.3551	55.1521	53.8562	61.4554
SRR99	53.4131	54.5671	52.7319	60.1942
TMS-6	54.2508	54.7054	52.6845	56.0674
AM1	54.4701	55.14	53.4803	61.4554
Avg. 1G SX	54.3551	54.8752	53.1749	61.4554
CMSX-4	55.0624	55.4013	60.692	62.7628
PWA1484	55.9169	55.5379	60.3335	62.7628
Rene N5	55.9169	55.4007	60.6389	62.7628
MC2	54.4701	55.1508	53.858	61.4554
Avg. 2G SX	55.0624	55.3727	60.0838	62.7628
CMSX-10	55.1294	55.4724	61.4593	62.7628
Rene N6	56.2224	55.8514	61.4301	62.7628
TMS-75	56.2224	55.9415	61.4745	62.7628
Avg. 3G SX	55.0624	55.7551	61.4543	62.7628
CMSX-10var	55.0045	55.5393	61.5484	62.7628
EPM-102	56.0809	56.0447	59.8089	62.7628
PWA1497	56.0809	56.0504	59.8152	62.7628
TMS-138	55.7861	55.7713	60.35	62.7628
TMS-138A	55.7861	55.7628	59.6721	62.7628
MC-NG	54.7222	55.2155	58.737	62.7628
MX4	56.0809	56.0418	59.8419	62.7628
Avg. 4G SX	54.8806	55.7751	59.9517	62.7628
TMS-162	55.7861	55.7046	58.4735	62.7628
TMS-173	55.7861	55.8103	59.5142	62.7628
TMS-196	55.7861	55.7116	59.3591	62.7628
Avg. 5G SX	55.7861	55.7421	59.139	62.7628
TMS-238 (6G SX)	55.7861	55.5361	59.2595	62.7628
CMSX-8	54.8526	55.2419	59.0518	62.7628
Rene N515	55.9169	55.2029	58.9338	62.7628
LEK94	55.0624	55.536	61.2309	62.7628
DD6	55.7179	55.5188	59.7697	62.7628
Avg. low-Re SX	54.9336	55.3749	59.862	62.7628
